# Supplementary material for: Comparative Analysis of the National Fatality Rate in Construction Industry Using Time-Series Approach and Equivalent Evaluation Conditions
Source: MDPI journal article supplement (doi:10.3390/ijerph19042312), 2022-02-17
Supplement: s1 [file s1]

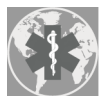

Article

# Supplementary Materials for Comparative Analysis of the National Fatality Rate in Construction Industry Using Time-Series Approach and Equivalent Evaluation Conditions

Yukyung Shim <sup>1</sup>, Jaemin Jeong <sup>1</sup>, Jaewook Jeong <sup>1,\*</sup>, Jaehyun Lee <sup>1</sup> and Yongwoo Kim <sup>2</sup>

<sup>1</sup> Department of Safety Engineering, Seoul National University of Science and Technology, 232 Gongneung-ro, Nowon-gu, Seoul 01811, Korea; mancy99@seoultech.ac.kr (Y.S.); ss96011@seoultech.ac.kr (J.J.); archi0528@seoultech.ac.kr (J.L.)

<sup>2</sup> Department of Construction Management, University of Washington, 105 Arch Hall, Seattle, WA 98195, United States America; yongkim@uw.edu (Y.K.)

\* Correspondence: jaewook.jeong@seoultech.ac.kr; Tel.: +82-2-970-6381

## TABLE Captions

Table S1. Analysis of the number of workers in the construction industry considering national data

Table S2. Analysis of the amount of construction revenue for calculation of full-time equivalent workers considering the equivalent conditions

Table S3. Analysis of the amount of monthly wage of construction workers for calculation of full-time equivalent workers considering the equivalent conditions

Table S4. The labor ratio of South Korea for the construction industry

Table S5. Analysis of the number of full-time equivalent workers considering the equivalent conditions by various countries

**Table S1.** Analysis of the number of workers in the construction industry considering national data

| Year    | The number of workers in construction industry<br>(number) |           |            |           |           |           |
|---------|------------------------------------------------------------|-----------|------------|-----------|-----------|-----------|
|         | South Korea                                                | Japan     | China      | Singapore | Mexico    | The U.K.  |
| 2012    | 2,786,587                                                  | 3,410,000 | 42,439,900 | 440,700   | 1,241,453 | 2,062,000 |
| 2013    | 2,566,832                                                  | 3,420,000 | 44,727,400 | 479,300   | 1,211,501 | 2,126,000 |
| 2014    | 3,249,687                                                  | 3,430,000 | 45,129,000 | 494,000   | 1,368,318 | 2,147,000 |
| 2015    | 3,358,813                                                  | 3,420,000 | 50,665,800 | 501,200   | 1,416,283 | 2,217,000 |
| 2016    | 3,152,859                                                  | 3,350,000 | 51,598,300 | 489,900   | 1,520,838 | 2,183,000 |
| 2017    | 3,046,523                                                  | 3,380,000 | 55,028,900 | 451,800   | 1,563,708 | 2,313,000 |
| 2018    | 2,943,742                                                  | 3,420,000 | 55,399,100 | 444,200   | 1,643,363 | 2,279,000 |
| Min     | 2,566,832                                                  | 3,350,000 | 42,439,900 | 440,700   | 1,211,501 | 2,062,000 |
| Max     | 3,358,813                                                  | 3,430,000 | 55,399,100 | 501,200   | 1,643,363 | 2,313,000 |
| Average | 3,015,006                                                  | 3,404,286 | 49,284,057 | 471,586   | 1,423,638 | 2,189,571 |

**Table S2.** Analysis of the amount of construction revenue for calculation of full-time equivalent workers considering the equivalent conditions

| Year    | The amount of construction revenue (\$) |                 |                   |                |                |                 |
|---------|-----------------------------------------|-----------------|-------------------|----------------|----------------|-----------------|
|         | South Korea                             | Japan           | China             | Singapore      | Mexico         | The U.K.        |
| 2012    | 274,499,434,000                         | 418,222,290,000 | 2,041,366,950,000 | 23,378,664,000 | 21,951,486,800 | 120,365,460,000 |
| 2013    | 290,644,318,960                         | 472,561,690,000 | 2,370,734,550,000 | 27,210,736,000 | 20,734,217,000 | 126,877,070,000 |
| 2014    | 296,285,694,560                         | 490,691,960,000 | 2,462,519,245,500 | 29,455,396,000 | 21,248,571,900 | 135,549,170,000 |
| 2015    | 302,219,475,600                         | 495,548,750,000 | 2,539,027,042,500 | 20,545,840,000 | 22,078,888,750 | 145,480,300,000 |
| 2016    | 328,042,232,480                         | 497,694,390,000 | 2,706,546,943,500 | 20,066,888,000 | 22,667,675,550 | 148,344,970,000 |
| 2017    | 360,605,667,440                         | 525,036,750,000 | 2,890,854,160,500 | 18,846,860,000 | 24,771,852,500 | 153,760,580,000 |
| 2018    | 362,626,036,200                         | 529,580,230,000 | 3,156,859,867,500 | 23,206,752,000 | 26,130,568,750 | 160,083,130,000 |
| Min     | 274,499,434,000                         | 418,222,290,000 | 2,041,366,950,000 | 18,846,860,000 | 20,734,217,000 | 120,365,460,000 |
| Max     | 362,626,036,200                         | 529,580,230,000 | 3,156,859,867,500 | 29,455,396,000 | 26,130,568,750 | 160,083,130,000 |
| Average | 316,417,551,320                         | 489,905,151,429 | 2,595,415,537,071 | 23,244,448,000 | 22,797,608,750 | 141,494,382,857 |

**Table S3.** Analysis of the amount of monthly wage of construction workers for calculation of full-time equivalent workers considering the equivalent conditions

| Year    | The amount of monthly wage of construction workers (\$) |       |       |           |        |          |
|---------|---------------------------------------------------------|-------|-------|-----------|--------|----------|
|         | South Korea                                             | Japan | China | Singapore | Mexico | The U.K. |
| 2012    | 2,389                                                   | 3,128 | 2,324 | 2,645     | 376    | 4,419    |
| 2013    | 2,562                                                   | 3,201 | 2,819 | 2,816     | 371    | 4,340    |
| 2014    | 2,717                                                   | 3,220 | 3,173 | 2,865     | 403    | 4,340    |
| 2015    | 2,905                                                   | 3,314 | 3,247 | 3,001     | 426    | 4,551    |
| 2016    | 3,136                                                   | 3,378 | 3,417 | 3,083     | 436    | 4,787    |
| 2017    | 3,301                                                   | 3,336 | 3,589 | 3,216     | 468    | 4,814    |
| 2018    | 3,330                                                   | 3,386 | 3,685 | 3,372     | 489    | 5,103    |
| Min     | 2,389                                                   | 3,128 | 2,324 | 2,645     | 376    | 4,419    |
| Max     | 3,330                                                   | 3,386 | 3,685 | 3,372     | 489    | 5,103    |
| Average | 2,906                                                   | 3,281 | 3,179 | 3,000     | 424    | 4,622    |

**Table S4.** The labor ratio of South Korea for the construction industry

| Year        | The labor ratio of South Korea                                                             |                                   |
|-------------|--------------------------------------------------------------------------------------------|-----------------------------------|
|             | General construction work                                                                  | Sub-contracting construction work |
| 2012        | 28%                                                                                        | 32%                               |
| 2013        | 28%                                                                                        | 32%                               |
| 2014        | 28%                                                                                        | 32%                               |
| 2015        | 27%                                                                                        | 31%                               |
| 2016        | 27%                                                                                        | 31%                               |
| 2017        | 27%                                                                                        | 30%                               |
| 2018        | 27%                                                                                        | 30%                               |
| Application | The equivalent labor rate (27%) is applied to calculation of full-time equivalent workers. |                                   |

**Table S5.** Analysis of the number of full-time equivalent workers considering the equivalent conditions by various countries

| Year    | The number of full-time equivalent workers in construction industry<br>(number) |           |            |           |           |          |
|---------|---------------------------------------------------------------------------------|-----------|------------|-----------|-----------|----------|
|         | South Korea                                                                     | Japan     | China      | Singapore | Mexico    | The U.K. |
| 2012    | 2,584,749                                                                       | 3,008,072 | 19,767,905 | 198,888   | 1,313,237 | 612,849  |
| 2013    | 2,552,557                                                                       | 3,321,661 | 18,925,502 | 217,431   | 1,258,144 | 657,749  |
| 2014    | 2,544,008                                                                       | 3,428,322 | 17,462,867 | 231,309   | 1,186,040 | 702,706  |
| 2015    | 2,340,655                                                                       | 3,363,971 | 17,591,712 | 154,030   | 1,165,728 | 719,314  |
| 2016    | 2,353,520                                                                       | 3,315,467 | 17,819,735 | 146,471   | 1,168,571 | 697,208  |
| 2017    | 2,457,715                                                                       | 3,541,346 | 18,122,607 | 131,845   | 1,190,954 | 718,712  |
| 2018    | 2,449,890                                                                       | 3,518,785 | 19,273,433 | 154,844   | 1,203,434 | 705,837  |
| Min     | 2,340,655                                                                       | 3,008,072 | 17,462,867 | 131,845   | 1,165,728 | 612,849  |
| Max     | 2,584,749                                                                       | 3,541,346 | 19,767,905 | 231,309   | 1,313,237 | 719,314  |
| Average | 2,469,014                                                                       | 3,356,803 | 18,423,394 | 176,402   | 1,212,301 | 687,768  |
